# Supplementary material for: Minimum set of mutations needed to optimize cyan fluorescent proteins for live cell imaging
Source: Royal Society of Chemistry journal article supplement (doi:10.1039/c2mb25303h), 2012-11-13
Supplement: c2mb25303h.pdf [file c2mb25303h.pdf]

13/11/12 **Erard et al**, Minimum set of mutations needed to optimize cyan  
fluorescent proteins for live cell imaging, submitted

### **Supplementary Information**

13/11/12 Erard et al, Minimum set of mutations needed to optimize cyan fluorescent proteins for live cell imaging, submitted

**Table S1: List of oligonucleotides used for mutagenesis. The mutagenic codons are bold.**

|               |                                                         |
|---------------|---------------------------------------------------------|
| T65S forward  | 5'-CGTGACCACCCT <b>GAG</b> CTGGGGCGTGCAGTGC-3'          |
| T65S reverse  | 5'-GCACTGCACGCCCCAG <b>CTC</b> AGGGTGGTCACG-3'          |
| S72A forward  | 5'-CGTGCAGTGCTT <b>CGCC</b> CGCTACCCGACCAC-3'           |
| S72A reverse  | 5'-GTGGTCGGGGTAG <b>CGGG</b> CGAAGCACTGCACG-3'          |
| Y145A forward | 5'-GCTGGAGTACAAC <b>GCC</b> ATCAGCGACAACGTC-3'          |
| Y145A reverse | 5'-GACGTTGTCGCTGAT <b>GGC</b> GTTGTA <b>CTC</b> CAGC-3' |
| H148D forward | 5'-CAACTACATCAG <b>CGACA</b> ACGTCTATATCACC-3'          |
| H148D reverse | 5'-GGTGATATAGACGTT <b>GTC</b> GCTGATGTAGTTG-3'          |
| H148G forward | 5'-CAACTACATCAG <b>CGG</b> CAACGTCTATATCACC-3'          |
| H148G reverse | 5'-GGTGATATAGACGTT <b>GCC</b> GCTGATGTAGTTG-3'          |
| S175G forward | 5'-CAACATCGAGGACGG <b>CGG</b> CGTGCAGCTCGCC-3'          |
| S175G reverse | 5'-GGCGAGCTGCAC <b>GCC</b> GCCGTCTCGATGTTG-3'           |
| A206K forward | 5'-CCTGAGCACCCAGTCCA <b>AG</b> CTGAGCAAAGACCCC-3'       |
| A206K reverse | 5'-GGGGTCTTTGCTCAG <b>CTT</b> GGACTGGGTGCTCAGG-3'       |
| Y66A forward  | 5'-CGTGACCACCTTCGG <b>CGCC</b> GGCCTGATGTGC-3'          |
| Y66A reverse  | 5'-GCACATCAGGCC <b>GGC</b> GCCGAAGGTGGTCACG-3'          |

13/11/12 Erard et al, Minimum set of mutations needed to optimize cyan fluorescent proteins for live cell imaging, submitted

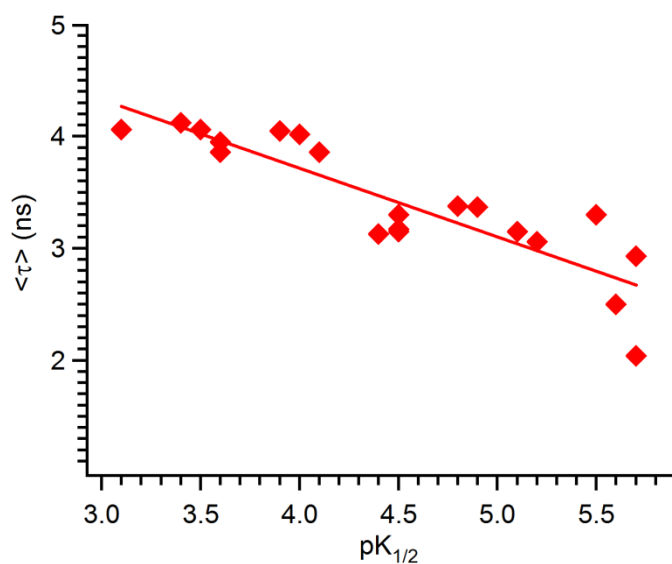

**Figure S1. Correlation of the average fluorescence lifetime of CFP mutants vs their pK<sub>1/2</sub>.** Data from all mutants of Table 1 are plotted in the figure, and a linear fit was applied for eye guidance.

13/11/12 Erard et al, Minimum set of mutations needed to optimize cyan  
fluorescent proteins for live cell imaging, submitted

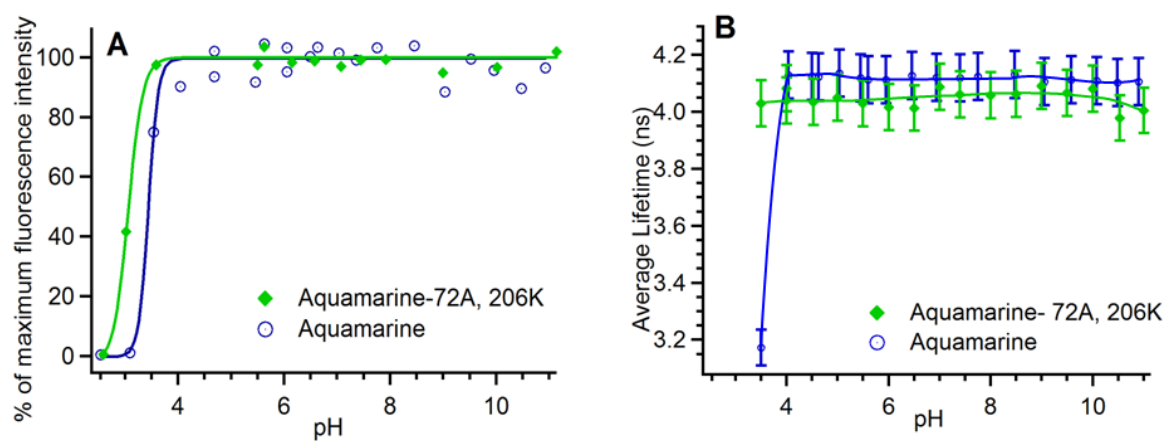

**Figure S2. Extended pH stability of Aquamarine-72A-206K vs Aquamarine.** (A) fluorescence intensity and (B) average lifetime.

13/11/12 Erard et al, Minimum set of mutations needed to optimize cyan  
fluorescent proteins for live cell imaging, submitted

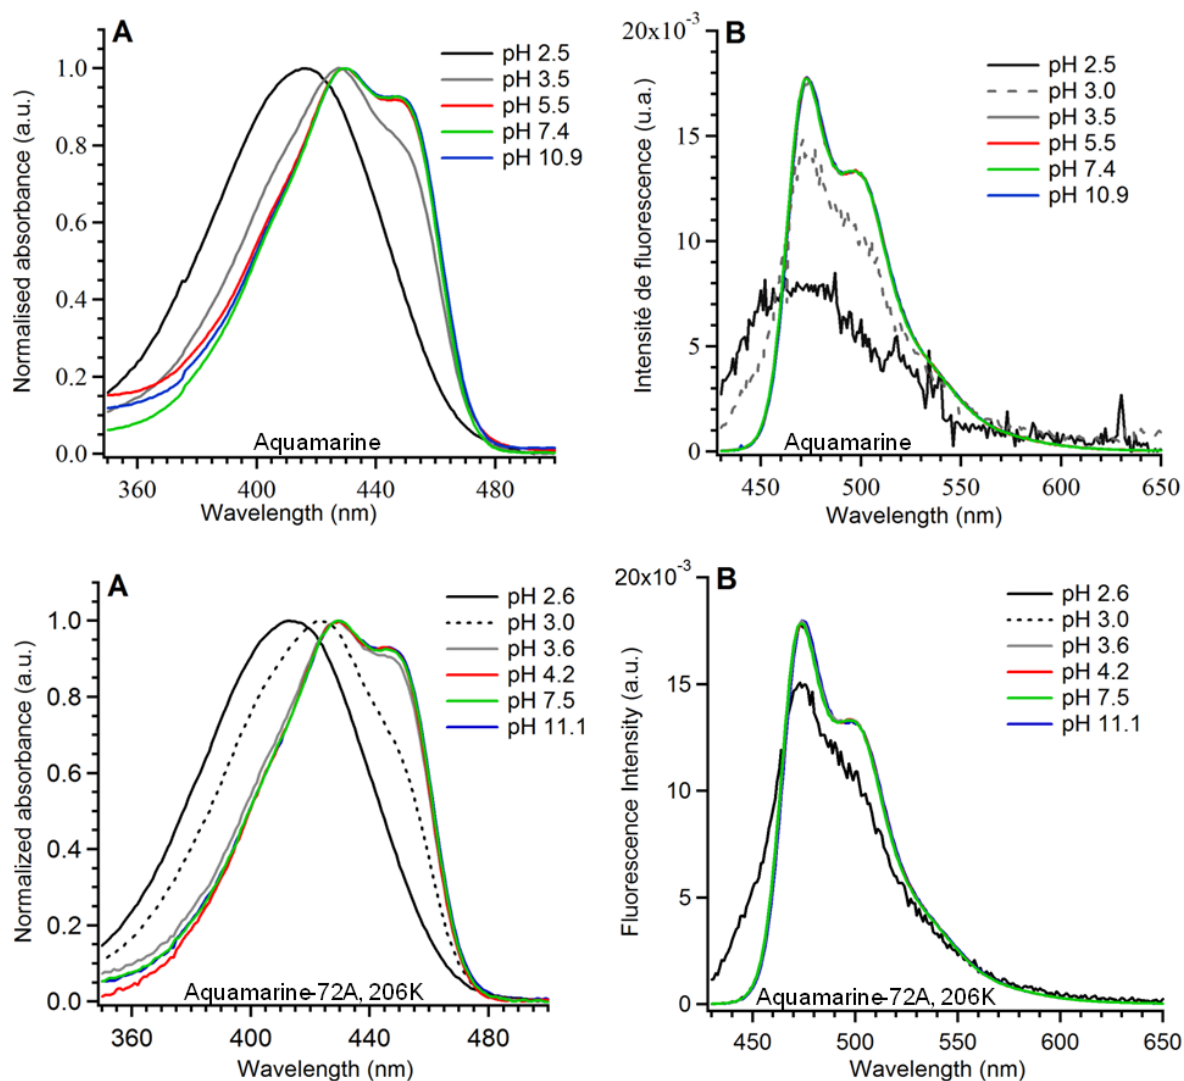

**Figure S3. pH dependence of the spectral properties of Aquamarine (top) and Aquamarine-72A-206K (bottom).** (A) Absorption and (B) emission spectra normalized to maximum of the chromophore band.

13/11/12 Erard et al, Minimum set of mutations needed to optimize cyan fluorescent proteins for live cell imaging, submitted

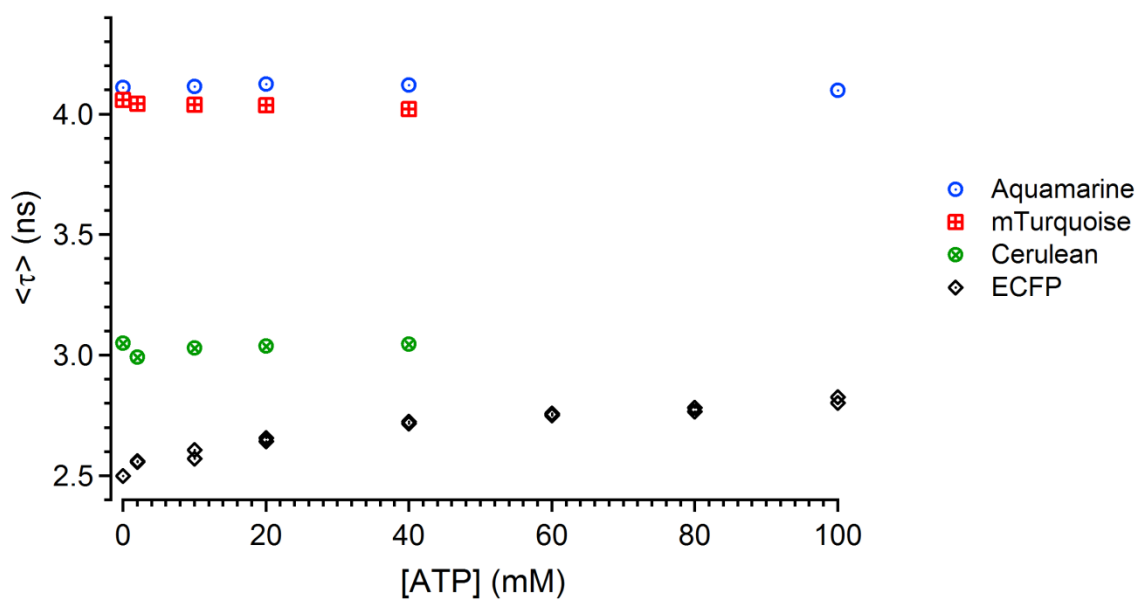

**Figure S4. Variations of the average fluorescence lifetime of purified CFP variants in the presence of ATP.**

13/11/12 Erard et al, Minimum set of mutations needed to optimize cyan fluorescent proteins for live cell imaging, submitted

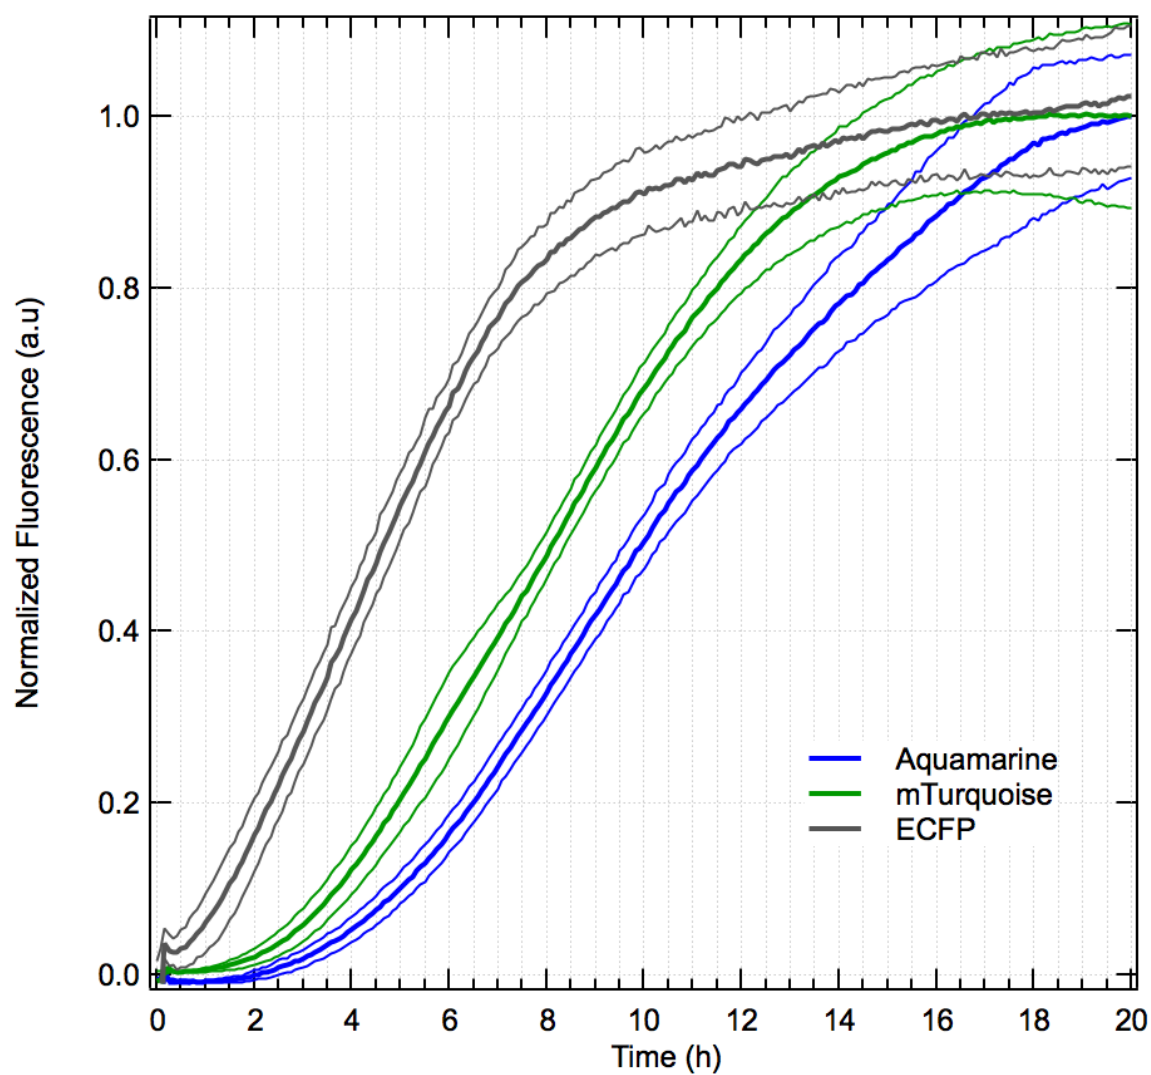

**Figure S5. Kinetics of production and maturation of Aquamarine, mTurquoise and ECFP in *E. coli*.** The bold line is the average of 10 to 15 wells from two independent experiments for each variant, thinner line represents SD.

13/11/12 Erard et al, Minimum set of mutations needed to optimize cyan  
fluorescent proteins for live cell imaging, submitted

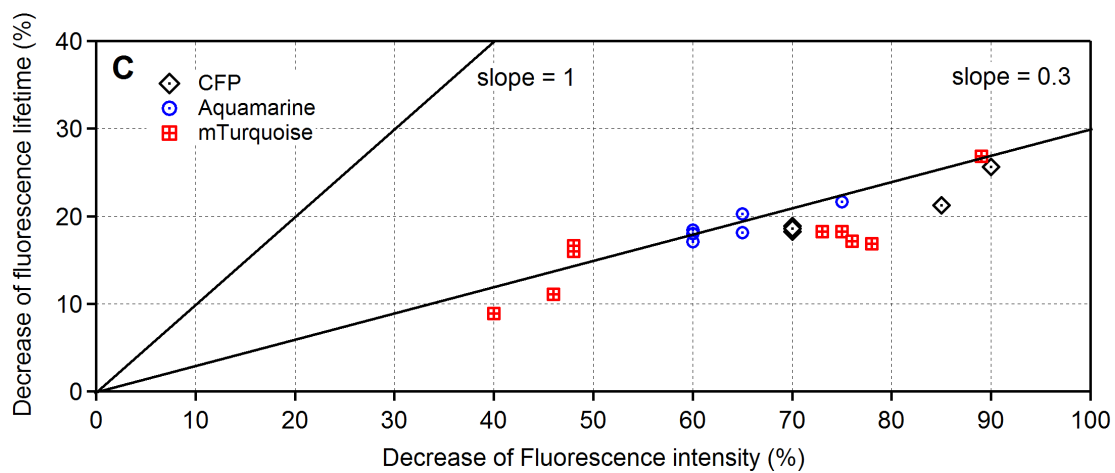

**Figure S6. Fluorescence lifetime changes during irreversible photobleaching of CFPs.** Black slopes were plotted for eye guidance only.



13/11/12 Erard et al, Minimum set of mutations needed to optimize cyan  
fluorescent proteins for live cell imaging, submitted

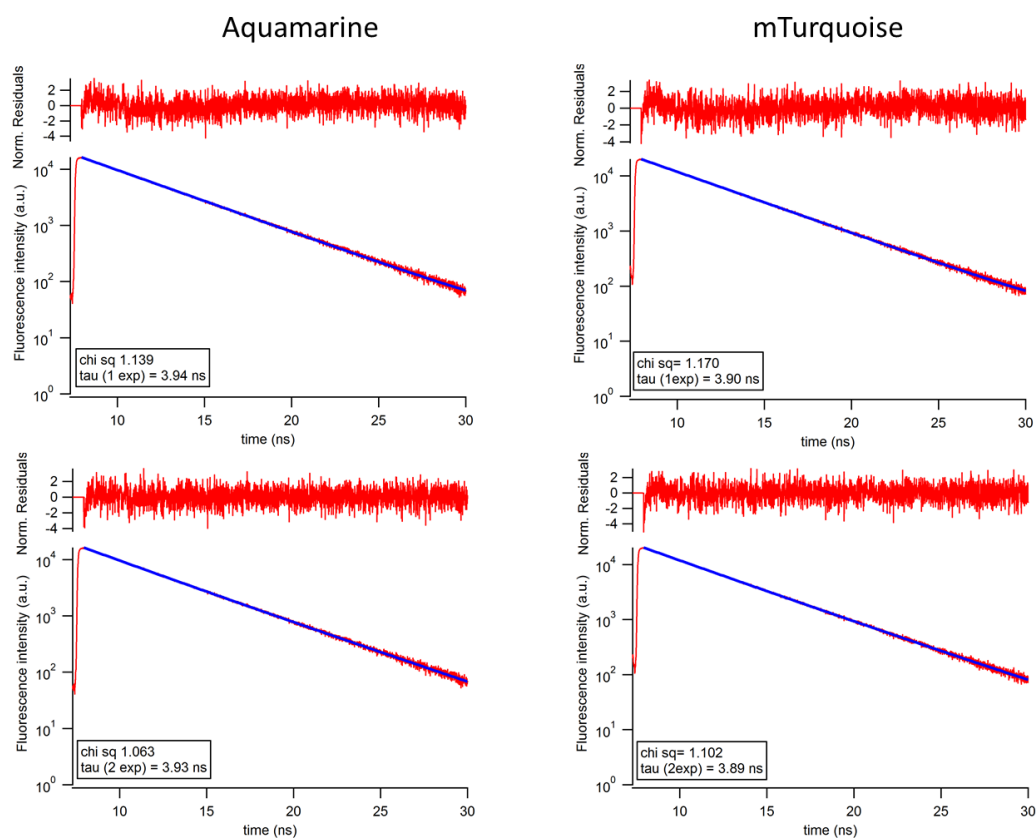

**Figure S7. Examples of fits of TCSPC histograms collected from cytosolic Aquamarine and mTurquoise.** Single exponential fits (top) and bi-exponential fits (bottom) of Aquamarine (left) and mTurquoise (right). The decay fit (blue), normalized residuals, chi square and average lifetime are shown.
